# Supplementary material for: Magnetic light and forbidden photochemistry: the case of singlet oxygen
Source: Royal Society of Chemistry journal article supplement (doi:10.1039/c7tc04130f), 2017-01-01
Supplement: c7tc04130f1.pdf [file c7tc04130f1.pdf]

**Supporting information for:**

**Magnetic Light and Forbidden Photochemistry:**

**The Case of Singlet Oxygen**

Alejandro Manjavacas,<sup>\*,†</sup> Roberto Fenollosa,<sup>‡</sup> Isabelle Rodriguez,<sup>‡</sup> M. Consuelo Jiménez,<sup>¶</sup> Miguel A. Miranda,<sup>¶</sup> and Francisco Meseguer<sup>\*,‡</sup>

<sup>†</sup>*Department of Physics and Astronomy, University of New Mexico, Albuquerque, New Mexico 87131, United States*

<sup>‡</sup>*Instituto de Tecnología Química (CSIC - UPV), Universitat Politècnica de Valencia, Av. Tarongers s/n 46022, Valencia, Spain*

<sup>¶</sup>*Departamento de Química, Universitat Politècnica de Valencia, Av. Tarongers s/n 46022, Valencia, Spain*

E-mail: manjavacas@unm.edu; fmese@fis.upv.es

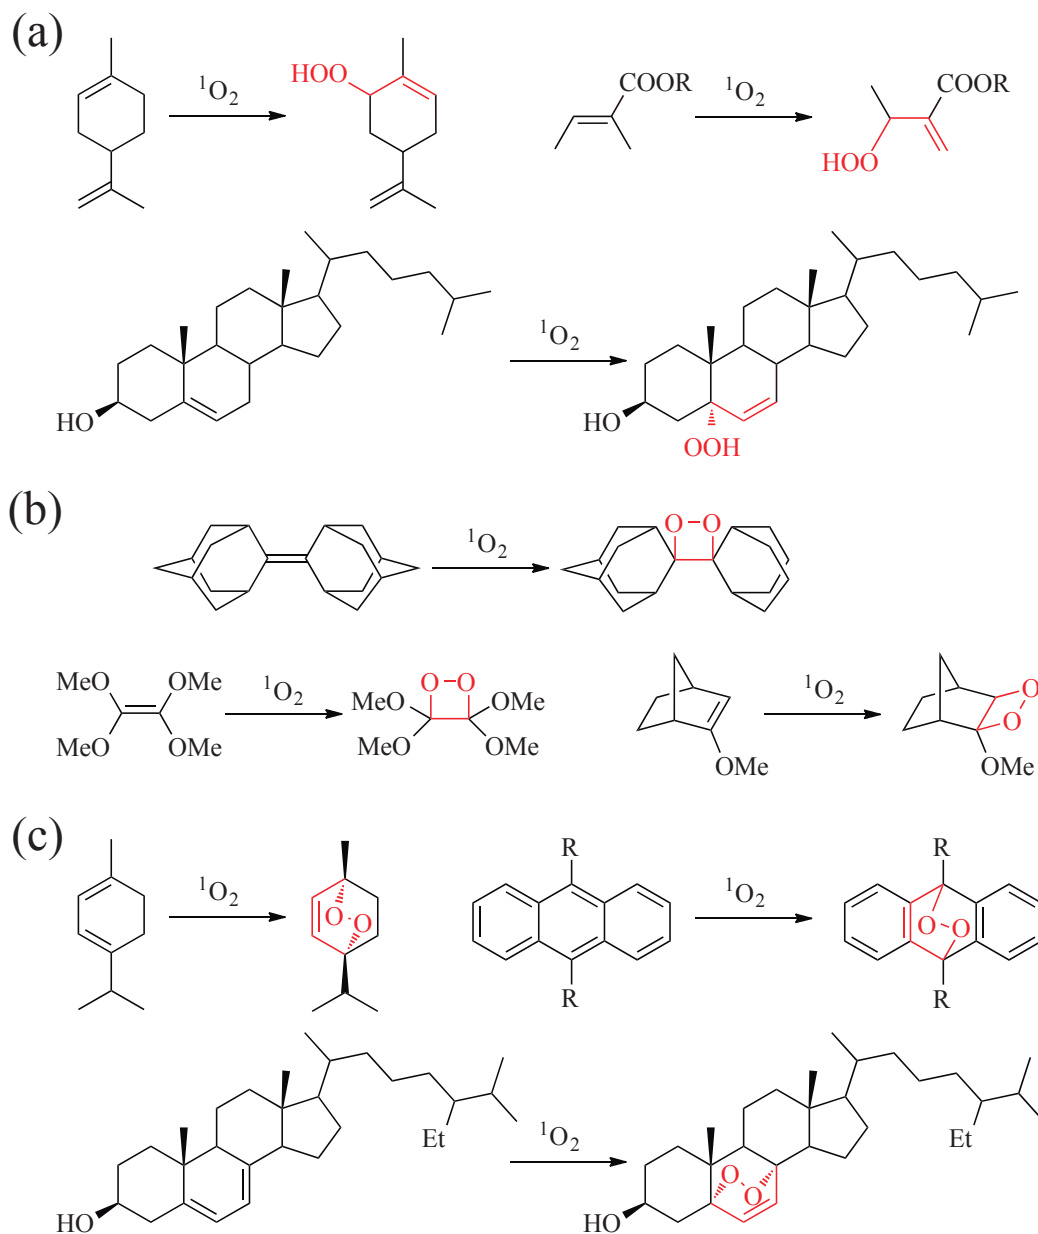

Figure S1: Test reactions of interest involving singlet oxygen that can be used for detecting and monitoring the singlet oxygen formation. (a) “ene” reactions to give allylic hydroperoxides, such as the oxygenation of limonene, tiglic acid, cholesterol. (b) Dioxetane formation through [2+2] cycloadditions with adamantylideneadamantane, tetramethoxyethene, or norbornene derivatives as probes. (c) [4+2] cycloadditions to the diene systems of 2,5-dimethylfuran, alpha-pinene, ergosterol or 9,10-disubstituted anthracenes, affording endoperoxides.
